# Supplementary material for: A putative RNA-interference-based immune system in prokaryotes: computational analysis of the predicted enzymatic machinery, functional analogies with eukaryotic RNAi, and hypothetical mechanisms of action
Source: Springer Nature journal article supplement (doi:10.1186/1745-6150-1-7), 2006-03-16

(A)

| MOTIFS                                                                                                                | specific                             | I                                       | II                                                                                                | III   | IV               | V                                                                                                                                                 |
|-----------------------------------------------------------------------------------------------------------------------|--------------------------------------|-----------------------------------------|---------------------------------------------------------------------------------------------------|-------|------------------|---------------------------------------------------------------------------------------------------------------------------------------------------|
| COGs 1336,1367,<br>1604,1337,1332<br><b>y1726-like</b><br>COG1851<br><b>BH0337-like</b>                               |                                      | h.h...s.h.hG.s                          | st-lKghh+.hh                                                                                      | hhGtt | h.D              | lGht.t.s.G.h                                                                                                                                      |
| COG1567<br>COG1769<br>COG1688 (Cas5)<br>COGs 1583,5551<br><b>YgcH-like</b><br><b>y1727-like</b><br><b>MJ0978-like</b> | hh.hhPphl<br>hHphlh<br>LHphLh<br>hNH | .hhh.p<br>hhh+ph-.hhh<br>h..h...hh.ht.s | slhlpEKvRGT<br>hghpG.p.aFh<br>l.pA-h+GIh-VIh<br>tp.s-lhtAh...h<br>.s.s-hhGhls.h<br>ss.sshhGhl..sh | h.G.h | lRTIdS<br>hhLpDV | YGuVts.Ghuh<br>hGFGRh<br>LGSREh.v.ht<br>lus.c.o.GG.h<br>hGtcp+hsthchp<br>lGttp..h.h<br>hGtpshCFG.l<br>hG.p+hGhGhh<br>.G.FsthGLstss<br>lG+tslhGcol |

(B)

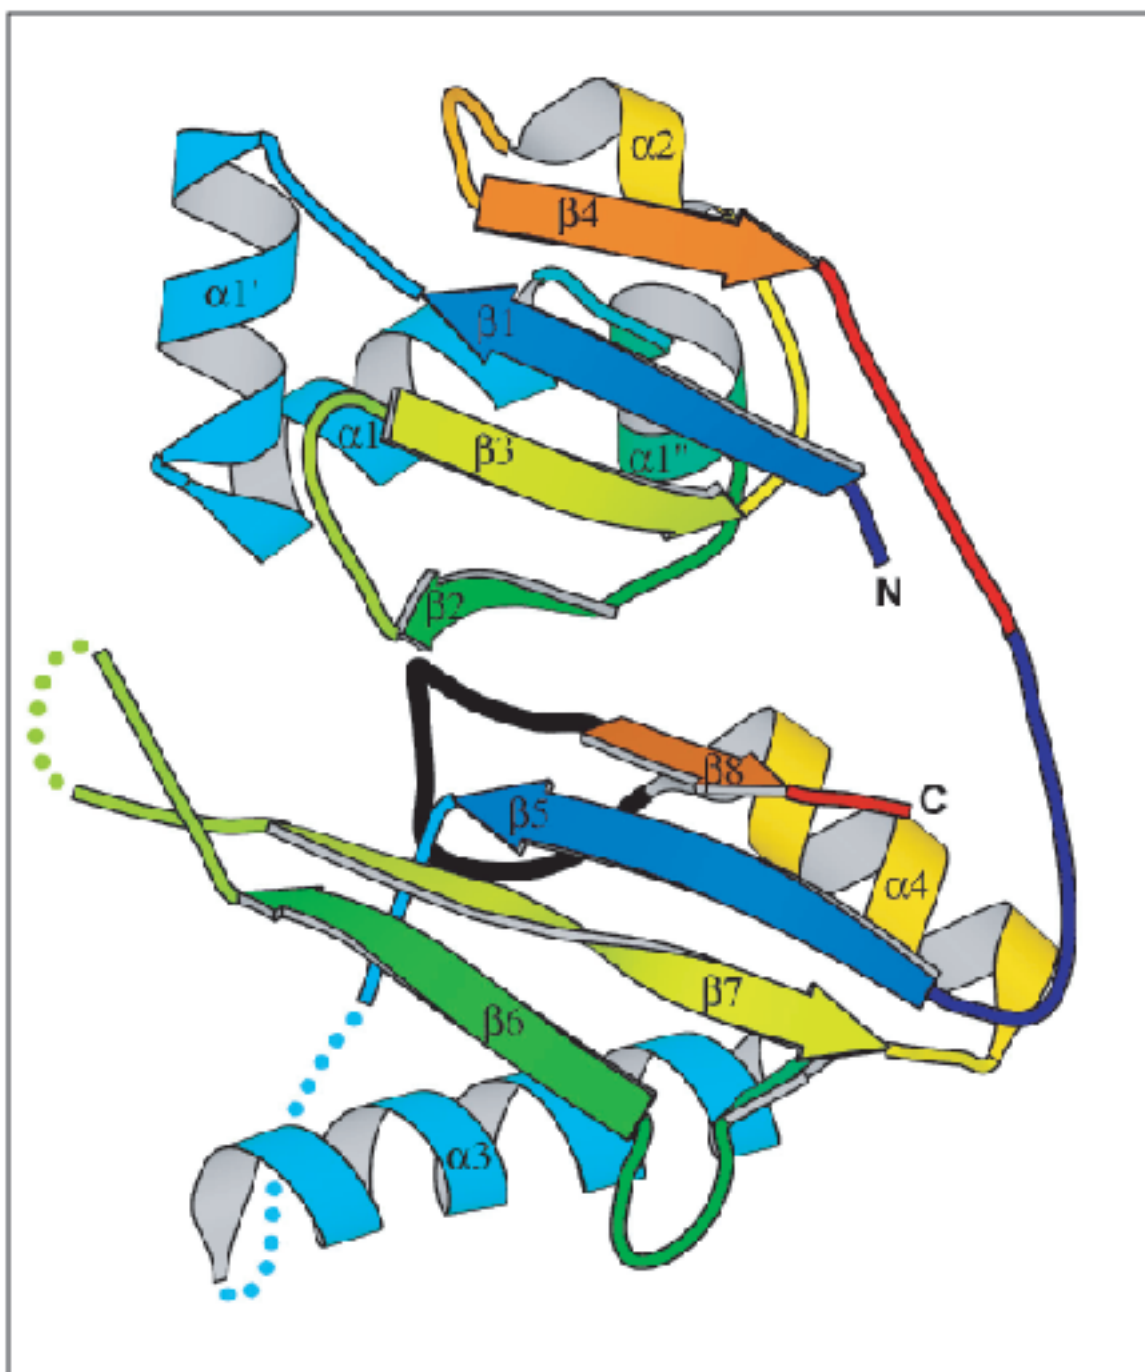

Supplement: 13062_2006_7_MOESM6_ESM.pdf [file 13062_2006_7_MOESM6_ESM.pdf]
