# Supplementary material for: A putative RNA-interference-based immune system in prokaryotes: computational analysis of the predicted enzymatic machinery, functional analogies with eukaryotic RNAi, and hypothetical mechanisms of action
Source: Springer Nature journal article supplement (doi:10.1186/1745-6150-1-7), 2006-03-16

(A)

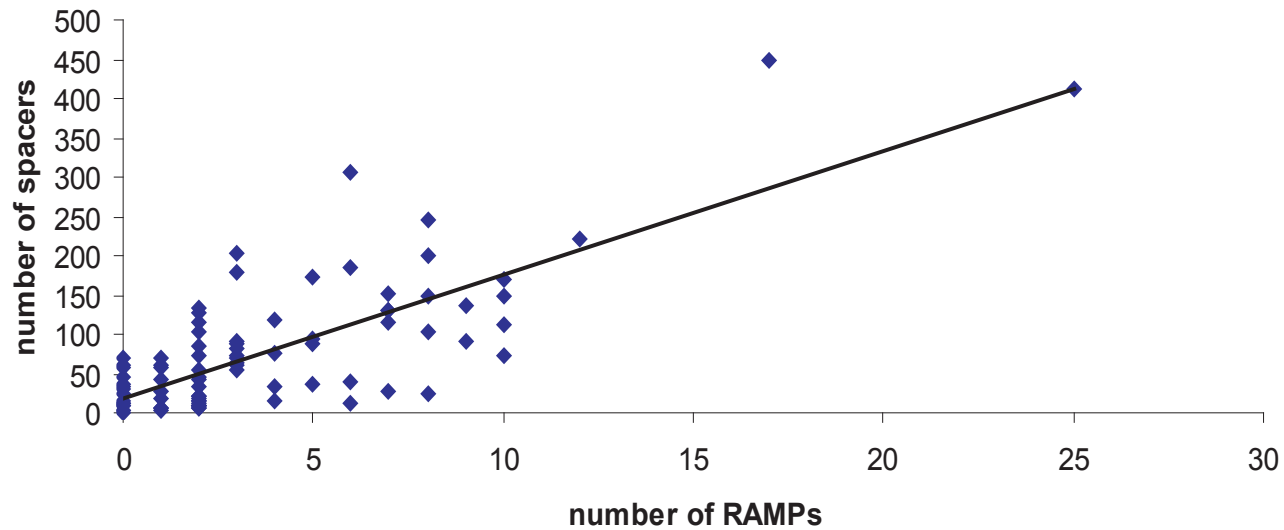

(B)

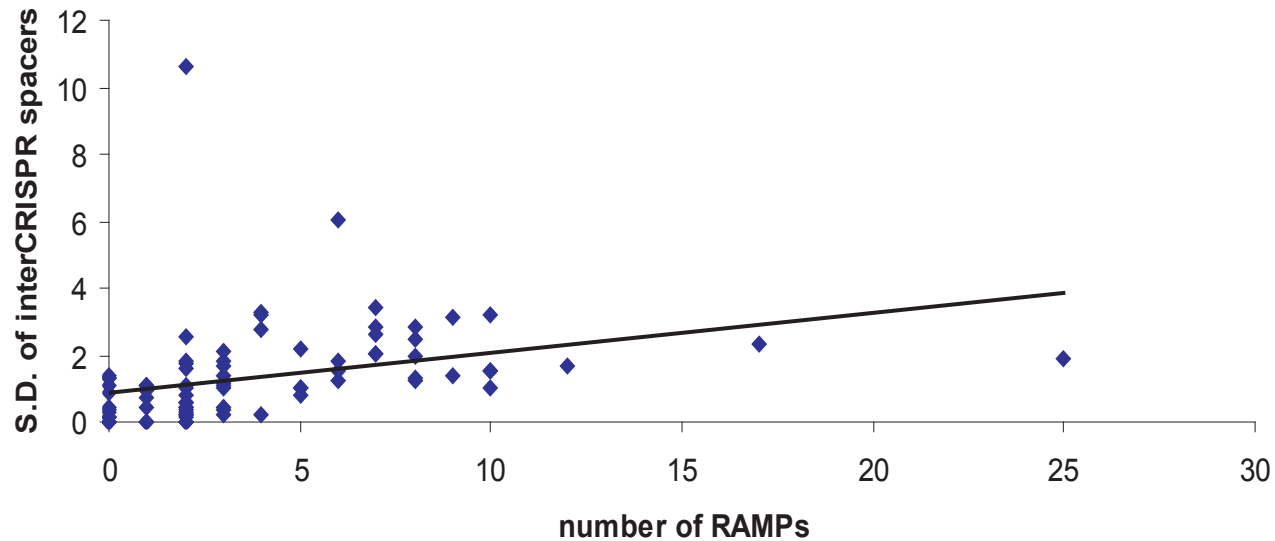

Supplement: 13062_2006_7_MOESM9_ESM.pdf [file 13062_2006_7_MOESM9_ESM.pdf]
