# Supplementary material for: A putative RNA-interference-based immune system in prokaryotes: computational analysis of the predicted enzymatic machinery, functional analogies with eukaryotic RNAi, and hypothetical mechanisms of action
Source: Springer Nature journal article supplement (doi:10.1186/1745-6150-1-7), 2006-03-16
Supplement: 13062_2006_7_MOESM11_ESM.pdf [file 13062_2006_7_MOESM11_ESM.pdf]

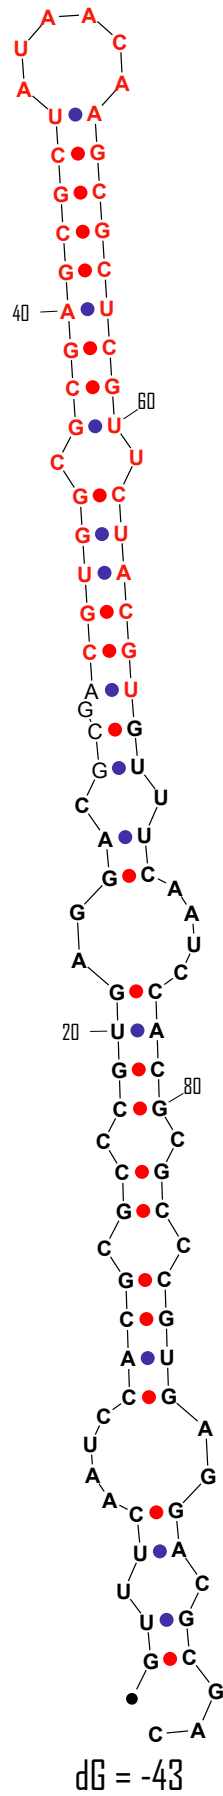

*Xanthomonas oryzae* KACC10331  
genome coordinates: 889005..889102

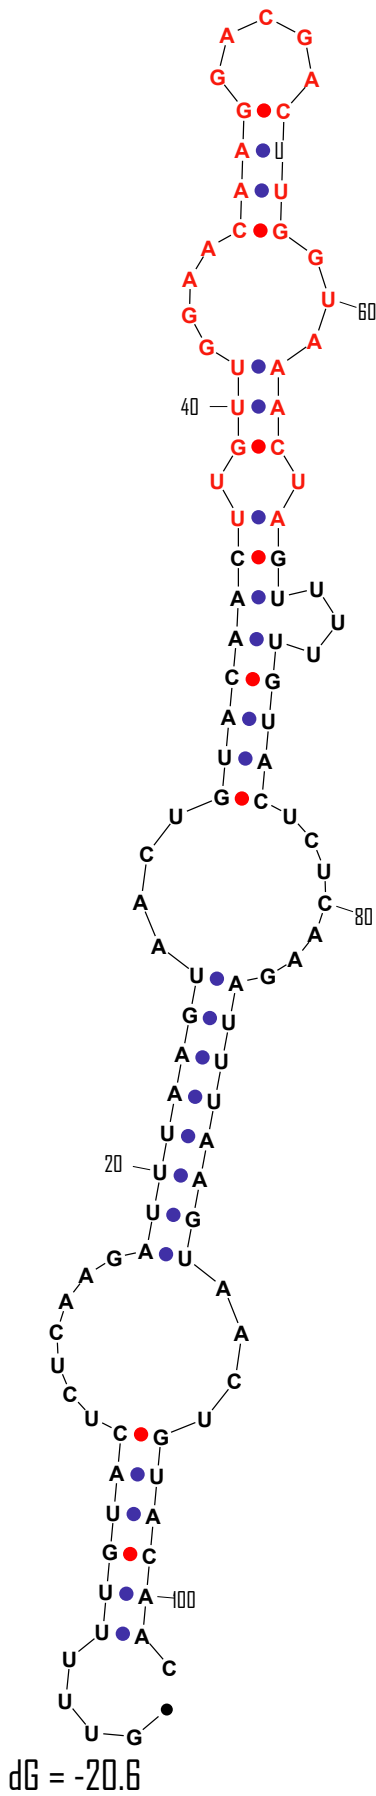

*Streptococcus thermophilus* CNRZ1066  
genome coordinates: 626487..626588
