# Supplementary figures and images for: A putative RNA-interference-based immune system in prokaryotes: computational analysis of the predicted enzymatic machinery, functional analogies with eukaryotic RNAi, and hypothetical mechanisms of action
Source: Springer Nature journal article supplement (doi:10.1186/1745-6150-1-7), 2006-03-16

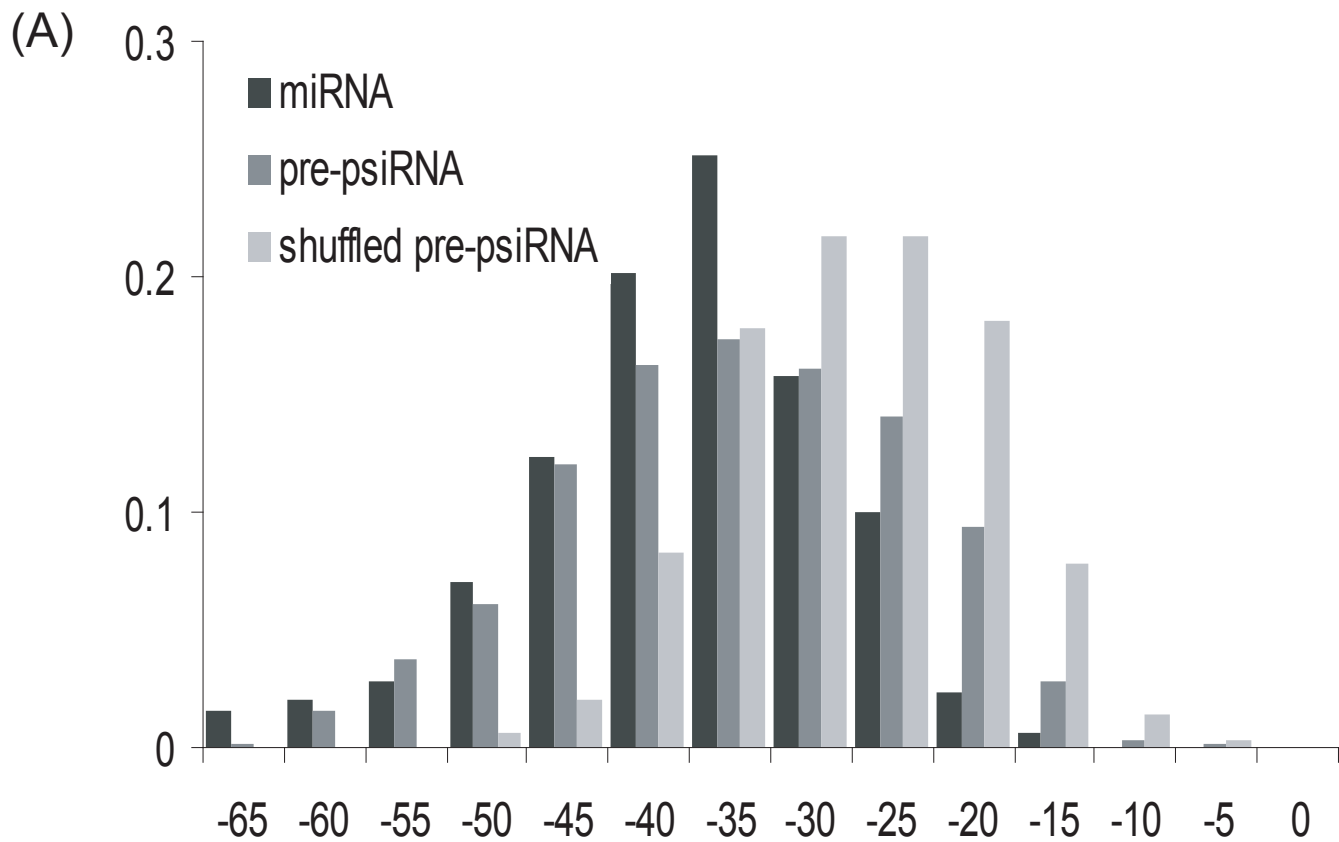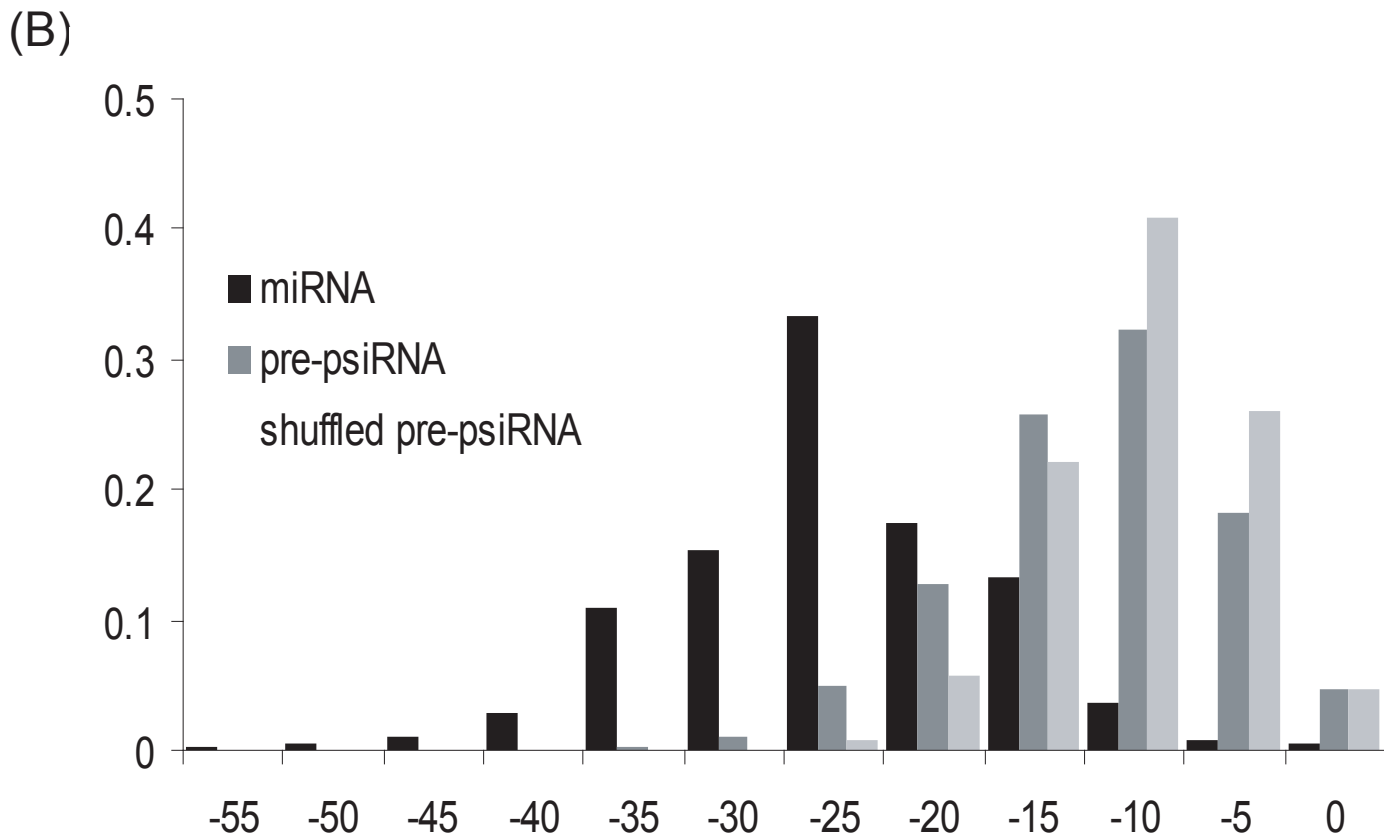

Supplement: 13062_2006_7_MOESM10_ESM.pdf [file 13062_2006_7_MOESM10_ESM.pdf]

# Percent of genomes encoding cas1 gene (COG1518) by taxon

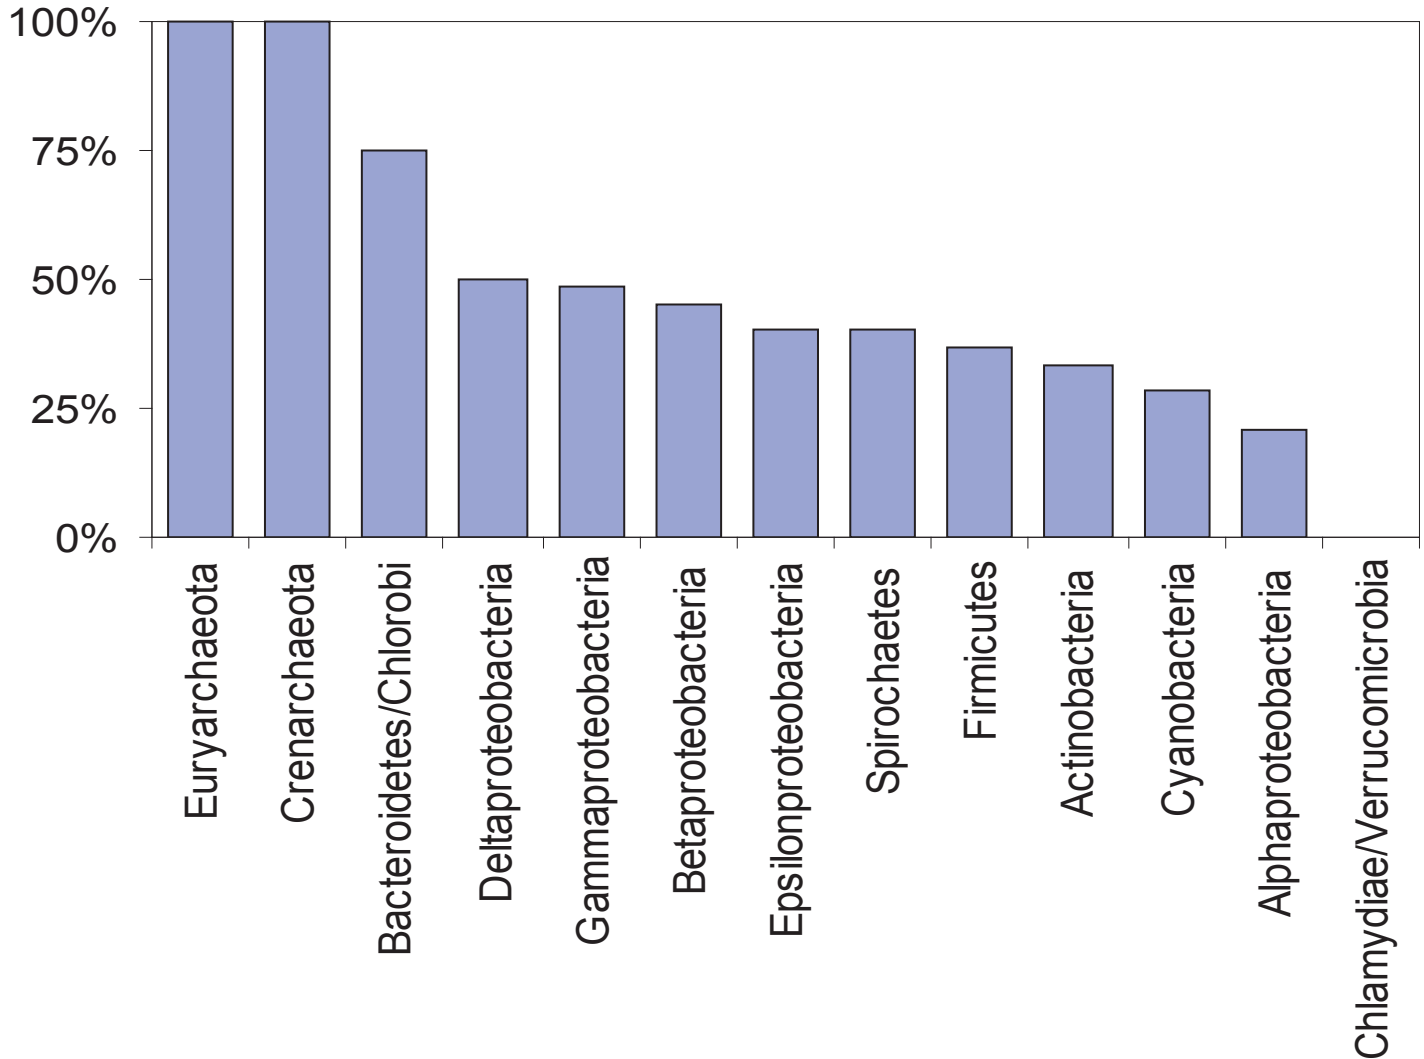

Supplement: 13062_2006_7_MOESM4_ESM.pdf [file 13062_2006_7_MOESM4_ESM.pdf]

# “Helicase” cassette

(a)

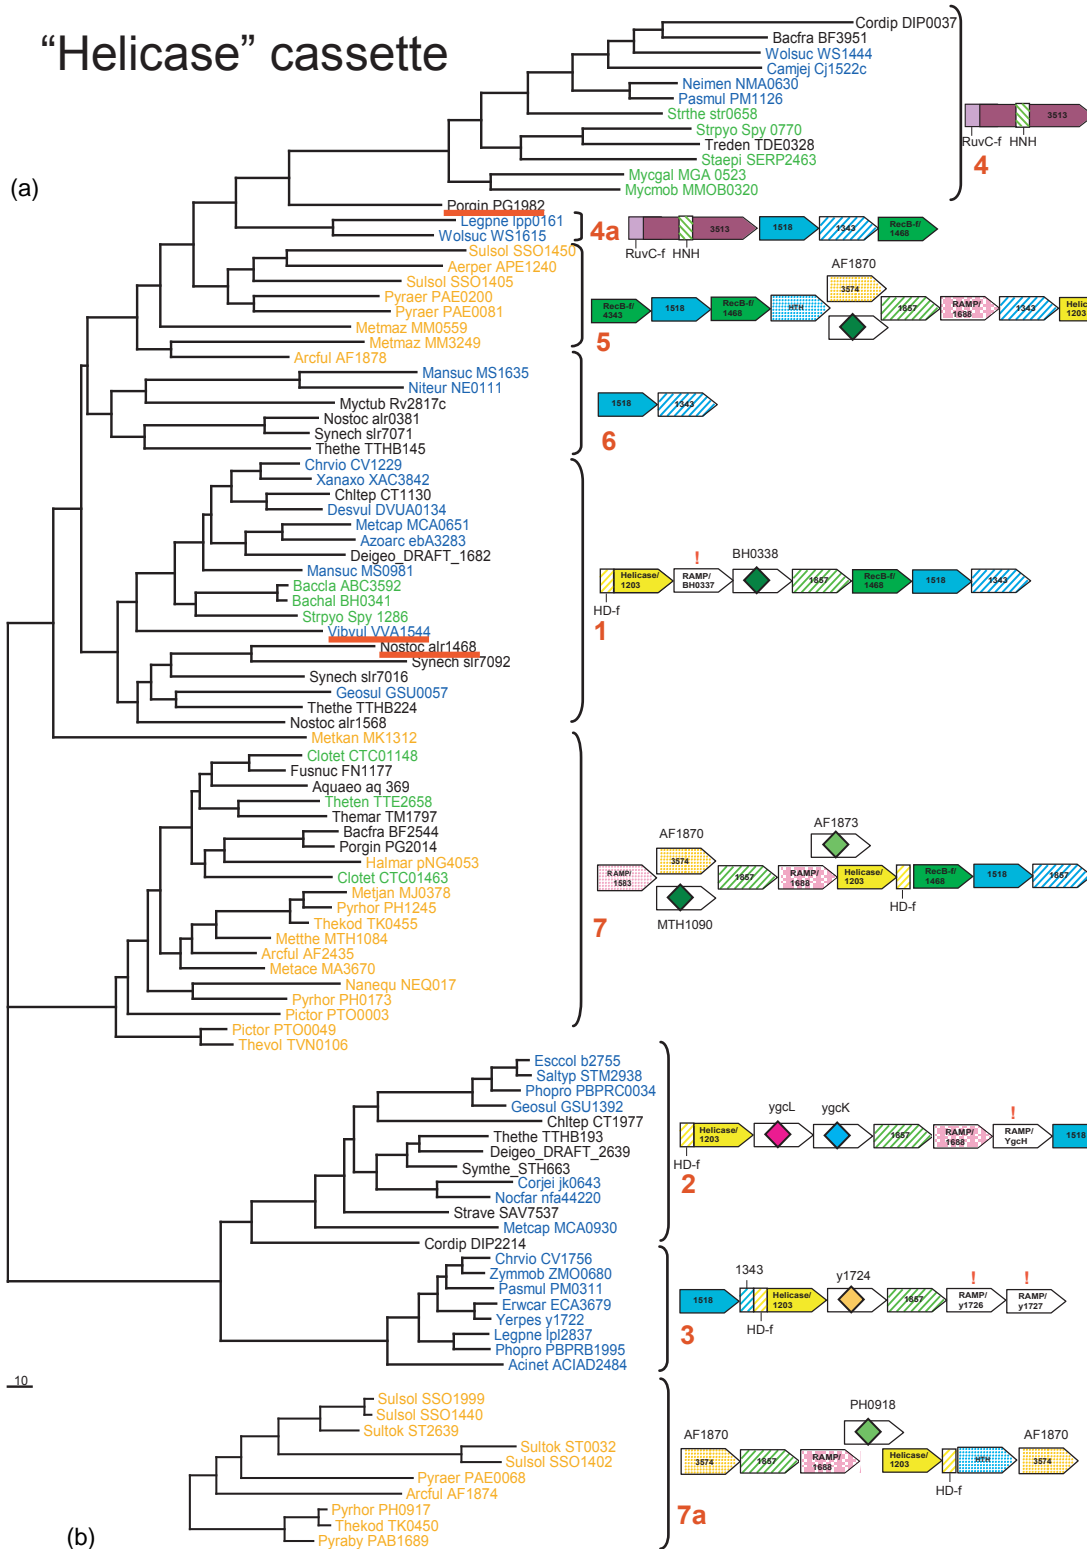

(c)

# “Polymerase” cassette

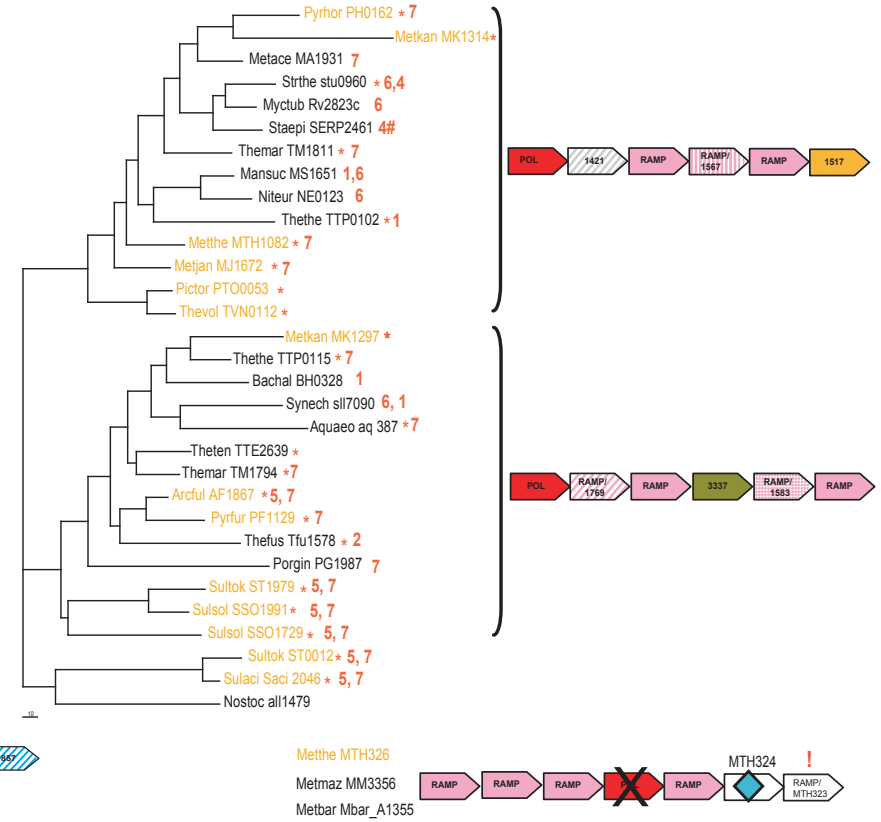

Supplement: 13062_2006_7_MOESM5_ESM.pdf [file 13062_2006_7_MOESM5_ESM.pdf]
